# Supplementary material
Source: PubMed Central journal article supplement (PMC7304550)
Supplement: NIHMS1590257-supplement-sup_info.pdf [file NIHMS1590257-supplement-sup_info.pdf]

# **Supplementary Information for**

**Human induced pluripotent stem cell line with genetically encoded fluorescent voltage indicator generated via CRISPR for action potential assessment post-cardiogenesis**

Yao-Hui Sun<sup>1,2</sup>, Hillary K. J. Kao<sup>1,2</sup>, Che-Wei Chang<sup>3</sup>, Alexander Merleev<sup>4</sup>, Jamie Overton<sup>1,2,5</sup>, Dalyir Pretto<sup>1,2</sup>, Sergey Yechikov<sup>1,2</sup>, Emanuel Maverakis<sup>4</sup>, Nipavan Chiamvimonvat<sup>1,6</sup>, James W. Chan<sup>3</sup>, Deborah K. Lieu<sup>1,2</sup>

Corresponding to Deborah K. Lieu, Ph.D. [dklieu@ucdavis.edu](mailto:dklieu@ucdavis.edu)

## **This file includes:**

**Supplementary Figures S1 to S6**

**Supplementary Table S1 to S4**

**Other Supplementary Materials for this manuscript includes the following:**

**Supplementary Movie S1 to S9**

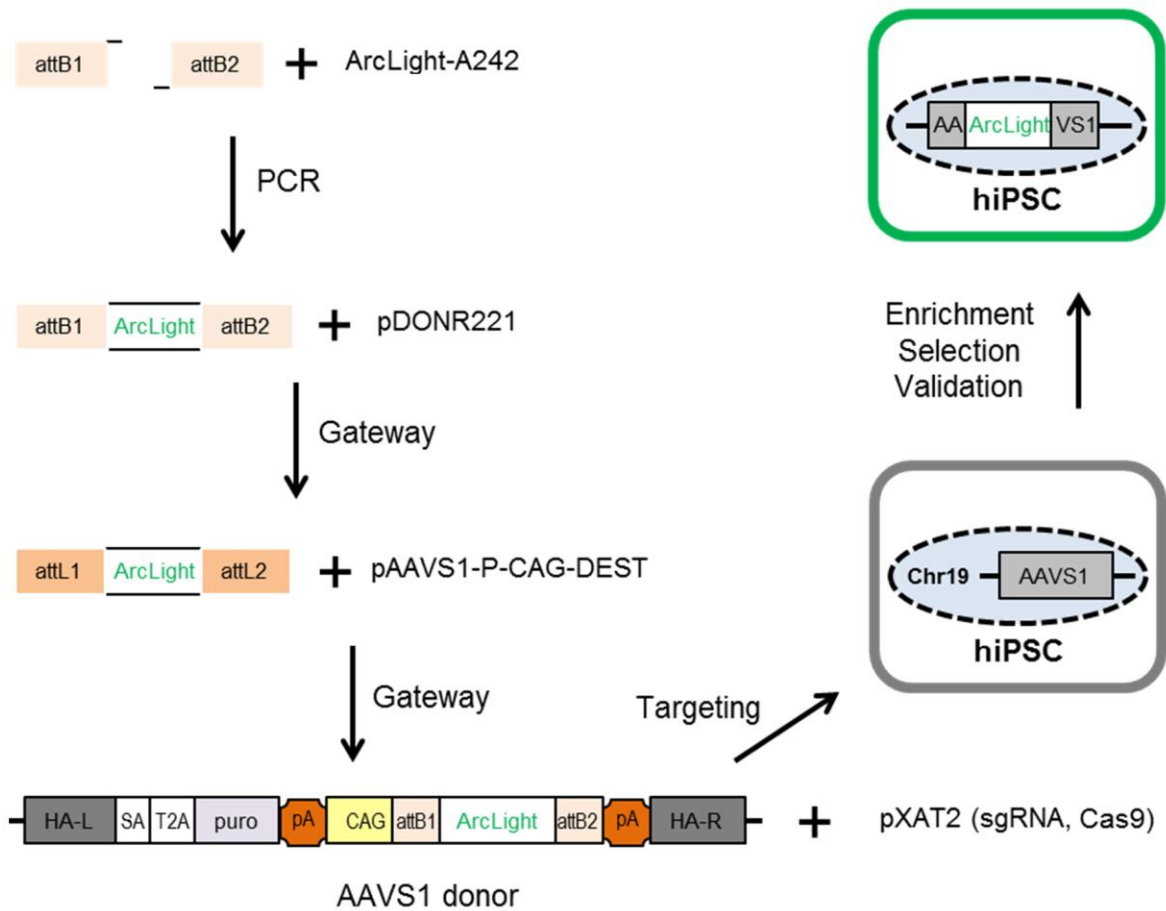

**Figure S1. A schematic showing overall strategy and flowchart to generate ArcLight reporter line in human iPSCs.** The cloning process was achieved in three main steps. First, Gateway (Invitrogen) cloned ArcLight reporter gene [23] into an AAVS1 destination vector [35]. Second, CRISPR/Cas9 mediated targeted ArcLight reporter gene to the AAVS1 locus [44]. Third, puromycin selection and enrichment by FACS were performed, followed by PCR screening and verification by Sanger sequencing.

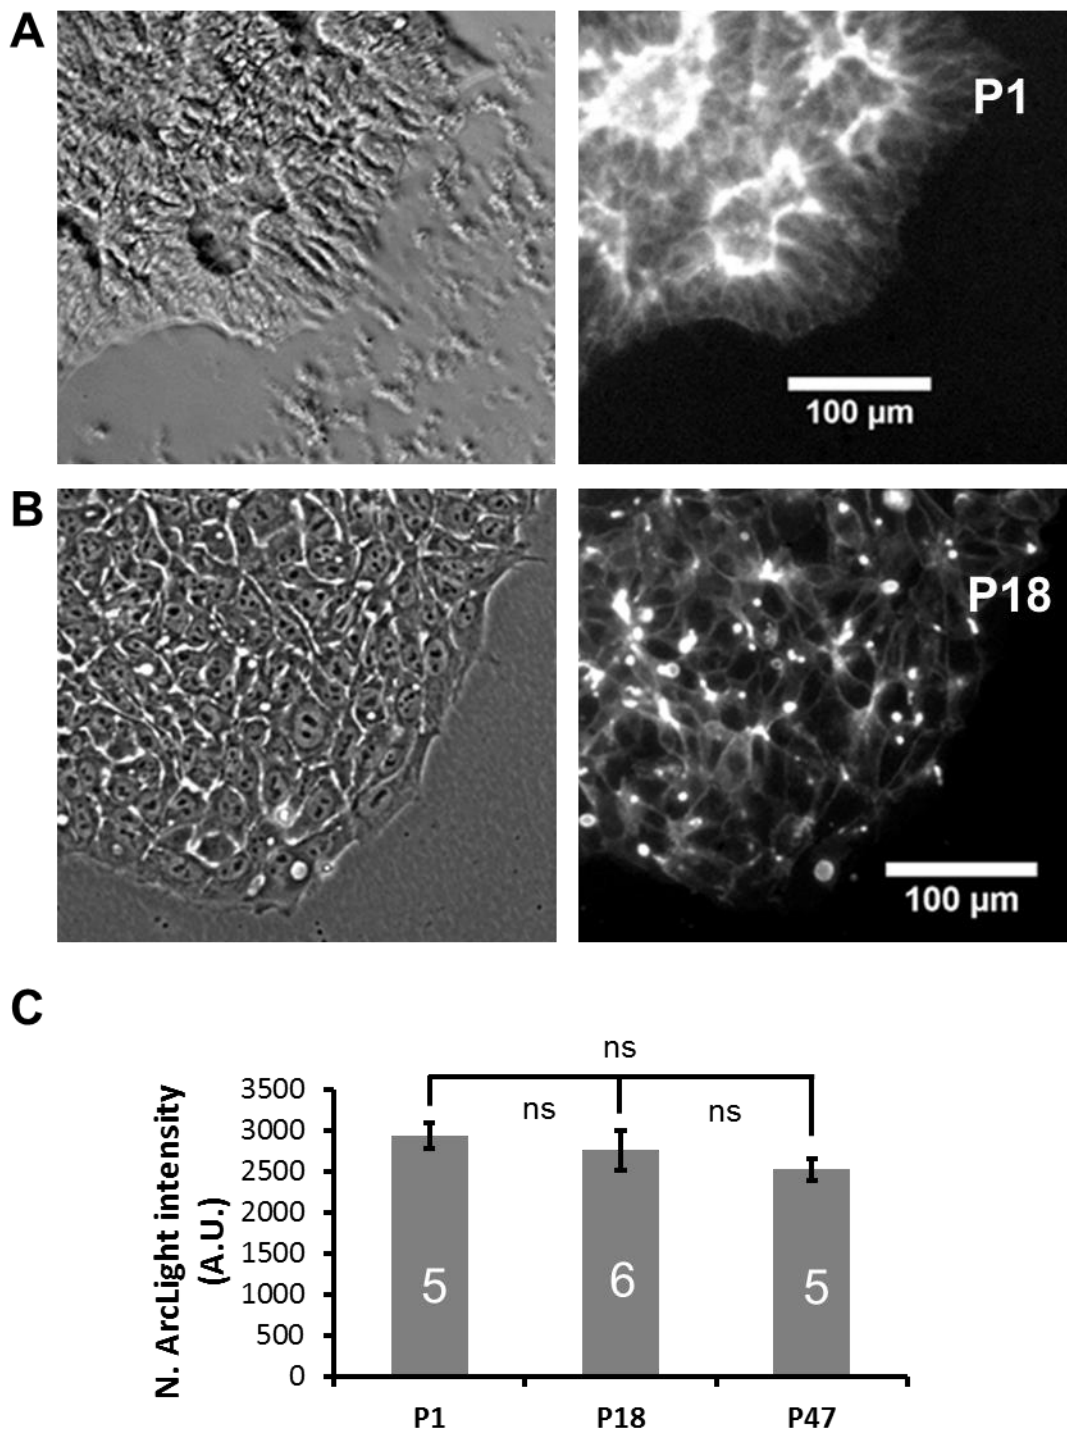

**Figure S2. Long-term expression of ArcLight in ArcLight-hiPSCs.** (A) Representative phase contrast and ArcLight fluorescent images of an ArcLight-hiPSC colony of the first passage (P1) after colony selection. (B) Representative phase contrast and ArcLight fluorescent images of ArcLight-hiPSCs that were maintained for 18 passages without puromycin selection. (C) Quantification of ArcLight expressing

in ArcLight-hiPSCs of different passages after colony selection. Normalized fluorescent intensities are present as Mean  $\pm$  SE in arbitrary units (A.U.). Sampling sizes are indicated inside each bar. ns: no significant difference by unpaired Student's *t*-test.

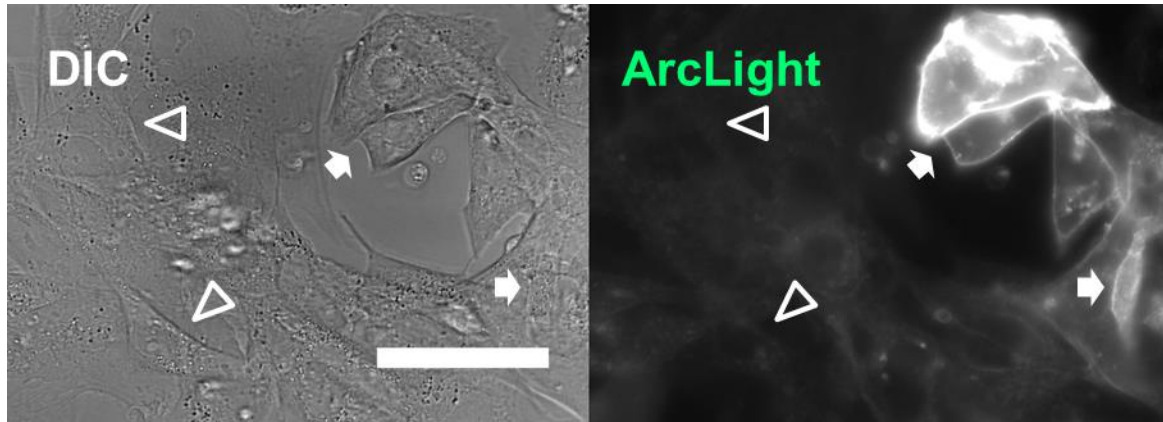

**Figure S3. Differential interference contrast (DIC) and ArcLight fluorescence images of live CMs and non-CMs.** Differentiated CMs (arrows) exhibited higher ArcLight intensity than non-CMs (arrowheads). Scale bar, 50  $\mu$ m.

**A** ArcLight-hiPSCs

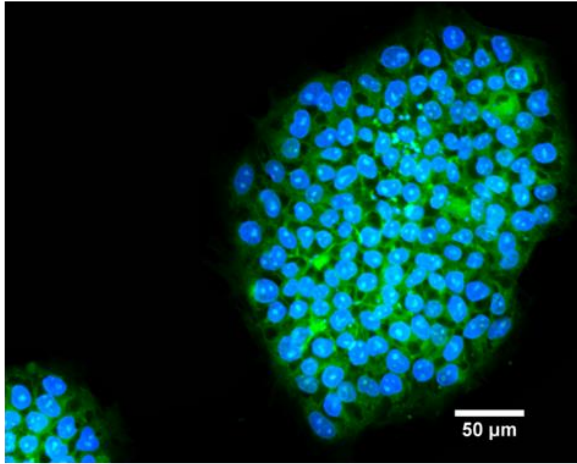

**B** ArcLight-CMs

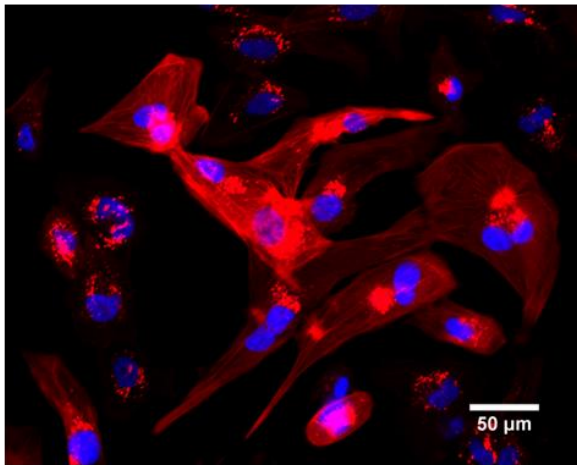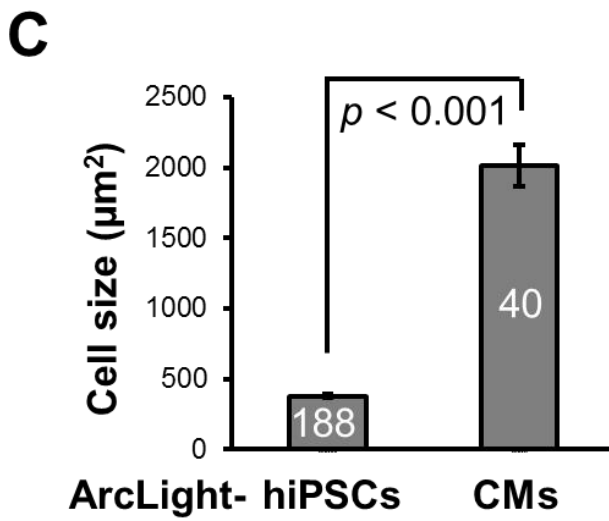

**Figure S4. Cell size comparison between ArcLight-hiPSCs and ArcLight-CMs.** (A) A representative image of hiPSCs expressing ArcLight (green). Nuclei were stained with Hoechst 33342 (blue). Scale bar, 50  $\mu\text{m}$ . (B) A representative image of ArcLight-CMs showing sarcomere structure labeled by anti-cTnT (red). Nuclei were stained with Hoechst 33342 (blue). Scale bar, 50  $\mu\text{m}$ . (C) Images of ArcLight-hiPSCs or ArcLight-CMs of D40 after differentiation were used to quantify cell size by thresholding ArcLight or cTnT signal with particle analysis tool in ImageJ. ArcLight-CMs are significantly larger than ArcLight-hiPSCs. Number of quantified cells is indicated inside each bar. Data is presented as Mean  $\pm$  SE. Statistic difference was analyzed by unpaired two-tail Student's *t*-test.

**A**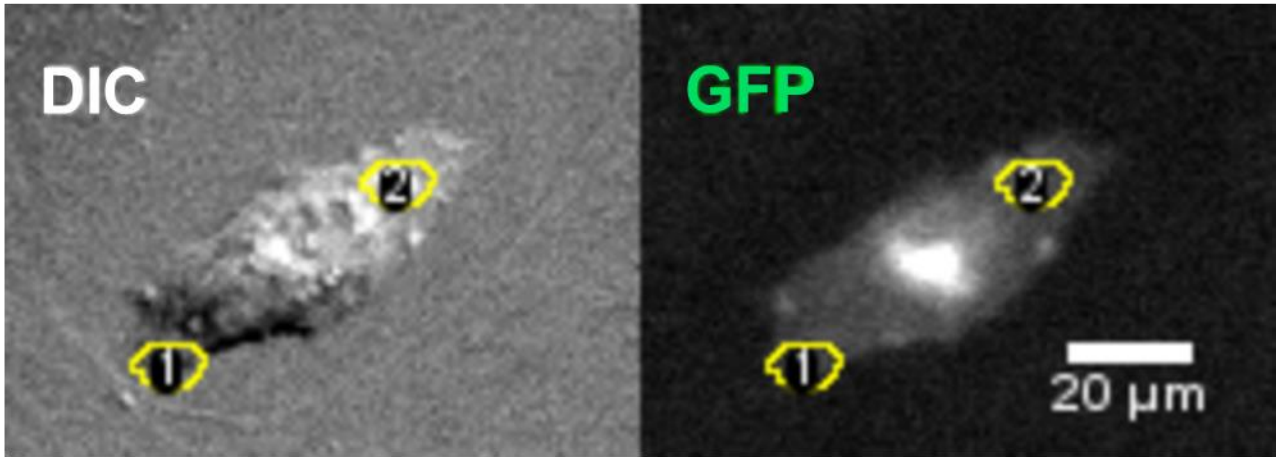**B**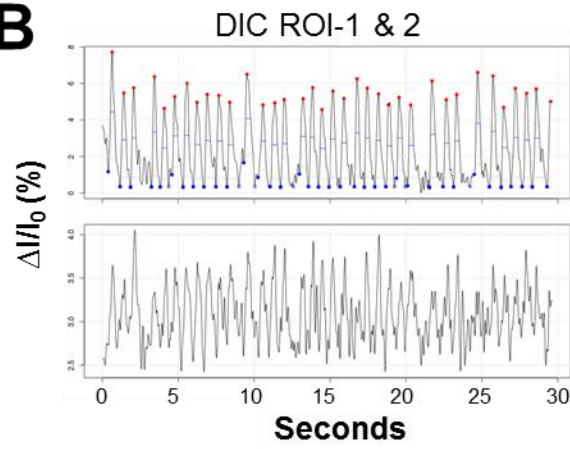**C**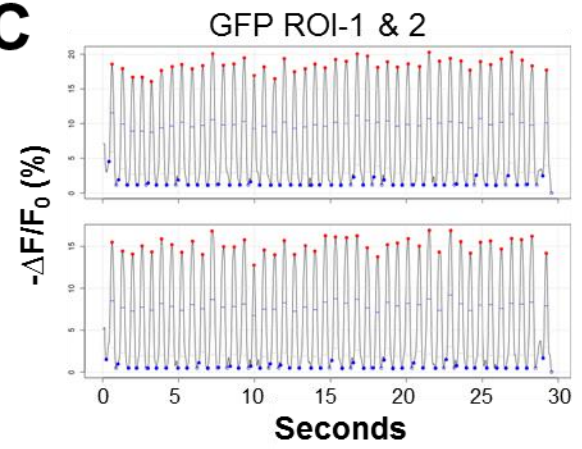**D**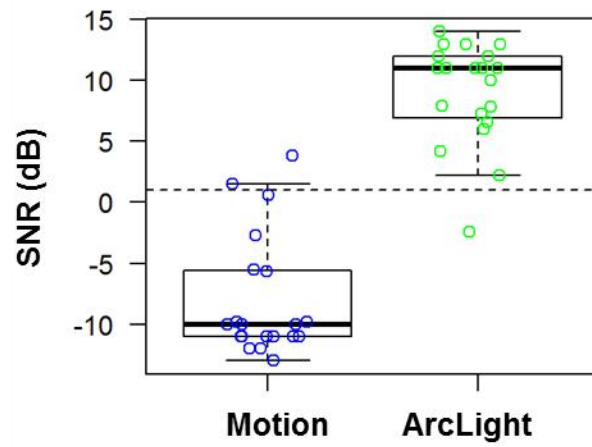

**Figure S5. Minimization of motion artifacts on optical recording of ArcLight.** (A) DIC and GFP fluorescence images of the same field showing two region of interest (ROI) in a beating ArcLight-CM. Scale bar, 20  $\mu\text{m}$ . (B) Traces based on mean intensity changes ( $\Delta I/I_0$ ) were processed with Spikemapping software (<https://amlab.shinyapps.io/spikemap/>). Motion effects were detected in ROI-1 that included a contrast cell boundary but absent in ROI-2 that covers a relatively uniform area within the cell. (C) Traces of ArcLight intensity changes ( $-\Delta F/F_0$ ) showing nearly identical AP profiles in both ROI-1 and -2. (D) Signal-to-noise ratio (SNR) of motion relative to ArcLight recording (n = 20).

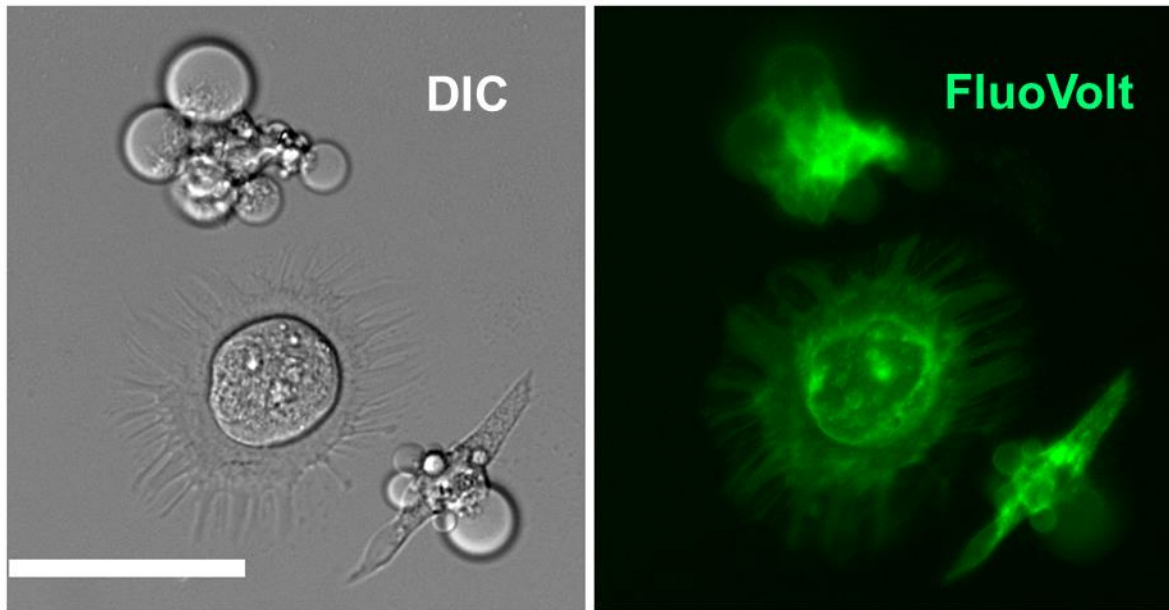

**Figure S6. Prolonged exposure to excitation light induced phototoxicity in hiPSC-CMs loaded with FluoVolt.** A representative DIC/FluoVolt image of hiPSC-CMs showing retraction of cell leading edge and blebbing of the cell membrane in response to excessive illumination. Scale bar, 50  $\mu\text{m}$ .



**Table S1. Primers used in this study**

| <b>Primer</b> | <b>Sequence (5' to 3')</b>                                        | <b>Description and Reference</b>                                                        |
|---------------|-------------------------------------------------------------------|-----------------------------------------------------------------------------------------|
| ArcLight-F    | GGGGACAAGTTTGTACAAAAA<br>GCAGGCTACCATGGAGGGATTC<br>GACGGTTCAG     | Forward primer with attB1 to amplify ArcLight cDNA from ArcLight A242 [23]              |
| ArcLight-R    | GGGGACCACTTTGTACAAGAAA<br>GCTGGGTTTCATTTGTATAGTTCA<br>TCCATGCCATG | Reverse primer with attB2 to amplify ArcLight cDNA from ArcLight A242 [23]              |
| 803           | TCGACTTCCCCTCTCCGATG                                              | Forward primer to amplify targeted AAVS1 region from edited hiPSC genomic DNA [35]      |
| 804           | GAGCCTAGGGCCGGGATTCTC                                             | Reverse primer in T2A to amplify the junction region from edited hiPSC genomic DNA [35] |
| 182           | CCCCTTACCTCTCTAGTCTGTGC                                           | Insertion sequence primer [35]                                                          |
| 183           | CTCAGGTTCTGGGAGAGGGTAG                                            | Combine with WT-F to amplify wild type or mutated allele of AAVS1 [35]                  |
| WT-F          | ATGGCCTTCTCCGACGGATGTC<br>TC                                      | Forward primer to amplify targeted or normal AAVS1. Also used for sequencing            |
| pCAG-F        | GCAACGTGCTGGTTATTGTG                                              | Forward sequence primer of ArcLight destination vector (Addgene)                        |
| BglobpA-R     | TTTTGGCAGAGGGAAAAAGA                                              | Reverse sequence primer of ArcLight destination vector (Addgene)                        |

**Table S2. Plasmids used in this study**

| <b>Plasmid</b>    | <b>Description</b>                                                      | <b>Reference or Source</b>                                                       |
|-------------------|-------------------------------------------------------------------------|----------------------------------------------------------------------------------|
| ArcLight A242     | Ci-VSP with super eclipic pHLuorin driven by CMV promotor               | <a href="https://www.addgene.org/36857/">https://www.addgene.org/36857/</a> [23] |
| pXAT2             | AAVS1 sgRNA-T2 and mammalian CRISPR/Cas9 co-expression vector           | <a href="https://www.addgene.org/80494/">https://www.addgene.org/80494/</a> [35] |
| pAAVS1-P-CAG-DEST | Gateway Destination vector for AAVS1 targeting with puromycin selection | <a href="https://www.addgene.org/80490/">https://www.addgene.org/80490/</a> [35] |
| pDONR221          | Gateway Donor vector                                                    | (Invitrogen)                                                                     |
| pArcLight-DNOR    | ArcLight Donor by BP recombination                                      | (This work)                                                                      |
| pArcLight-DEST    | ArcLight Destination by LR recombination                                | (This work)                                                                      |

**Table S3. Summary of optical APs in ArcLight-CMs**

| <b>Parameters</b>                    | <b>Fast (Mean <math>\pm</math> SE)</b> | <b>Slow (Mean <math>\pm</math> SE)</b> | <b>t-test (p value)</b> |
|--------------------------------------|----------------------------------------|----------------------------------------|-------------------------|
| Number of cells                      | 50                                     | 35                                     |                         |
| Amplitude (% change)                 | -14 $\pm$ 0.83                         | -20 $\pm$ 1.83                         | 0.011                   |
| APD <sub>50</sub> (ms)               | 203 $\pm$ 6.96                         | 323 $\pm$ 21.31                        | 0.000                   |
| APD <sub>90</sub> (ms)               | 348 $\pm$ 8.82                         | 509 $\pm$ 25.09                        | 0.000                   |
| APD <sub>50</sub> /APD <sub>90</sub> | 0.579 $\pm$ 0.01                       | 0.620 $\pm$ 0.01                       | 0.015                   |
| Frequency (bpm)                      | 110 $\pm$ 3.13                         | 46 $\pm$ 3.97                          | 0.000                   |
| V <sub>max</sub> (%/s)               | 115 $\pm$ 6.65                         | 137 $\pm$ 12.25                        | 0.120                   |
| SNR (dB)                             | 6.6 $\pm$ 0.41                         | 7.4 $\pm$ 0.72                         | 0.353                   |

**Table S4. Comparison of optical APs recorded with ArcLight or FluoVolt**

| <b>Parameters</b>                    | <b>ArcLight (Mean <math>\pm</math> SE)</b> | <b>FluoVolt (Mean <math>\pm</math> SE)</b> | <b>t-test (p value)</b> |
|--------------------------------------|--------------------------------------------|--------------------------------------------|-------------------------|
| Number of cells                      | 87                                         | 83                                         |                         |
| Amplitude (% change)                 | -16 $\pm$ 0.92                             | 17 $\pm$ 0.46                              | 0.748                   |
| APD <sub>50</sub> /APD <sub>90</sub> | 0.595 $\pm$ 0.01                           | 0.587 $\pm$ 0.01                           | 0.948                   |
| Frequency (bpm)                      | 87 $\pm$ 4.68                              | 69 $\pm$ 3.10                              | 0.004                   |
| V <sub>max</sub> (%/s)               | 124 $\pm$ 6.31                             | 129 $\pm$ 3.81                             | 0.457                   |
| SNR (dB)                             | 6.9 $\pm$ 0.38                             | 7.7 $\pm$ 0.21                             | 0.089                   |

**Movie S1:** An example of beating ArcLight-CM (related to Fig. 5A) recorded with a conventional epifluorescence microscope by monitoring relative fluorescent intensity changes of ArcLight. Movie plays in real time. Timestamp in ms. Scale bar, 50  $\mu\text{m}$ .

**Movie S2:** Motion effects on optical recording of ArcLight (related to Fig. S5). Time-lapse images of DIC and GFP channels are combined. Movie plays in real time. Timestamp in ms. Scale bar, 20  $\mu\text{m}$ .

**Movie S3:** Optical recording of an ArcLight-CM on differentiation day 21. Time-lapse images of DIC and GFP channels are combined. Movie plays in real time. Timestamp in ms. Scale bar, 50  $\mu\text{m}$ .

**Movie S4:** Continuous optical recording of an ArcLight-CM for 10 minutes with full excitation power. Movie plays in 60 $\times$  speed. Timestamp in mm:ss. Scale bar, 50  $\mu\text{m}$ .

**Movie S5:** Long-term monitoring of the same ArcLight-CM over 8 days. Movie combined from time-lapse images plays in real time. Timestamp in ms. Scale bar, 50  $\mu\text{m}$ .

**Movie S6:** Movie of time-lapsed images for ArcLight-CM recorded in Fig. 5B. A fast beating ArcLight-CM with pacemaker-like AP profile. Movie plays in real time. Timestamp in ms. Scale bar, 50  $\mu\text{m}$ .

**Movie S7:** Movie of time-lapsed images for ArcLight-CM recorded in Fig. 5C. A slow beating ArcLight-CM with working CM-like AP profile. Movie plays in real time. Timestamp in ms. Scale bar, 50  $\mu\text{m}$ .

**Movie S8:** A representative optical recording of WT hiPSC-CMs loaded with FluoVolt. Movie plays in real time. Timestamp in ms. Scale bar, 50  $\mu\text{m}$ .

**Movie S9:** Comparison of photobleaching of ArcLight and FluoVolt. Time-lapse images were recorded for 10 minutes with full excitation power. Combined-movie plays in 60 $\times$  speed. Timestamp in mm:ss. Scale bar, 50  $\mu\text{m}$ .
